# Supplementary material for: How do critical care staff respond to organisational challenge? A qualitative exploration into personality types and cognitive processing in critical care
Source: PLoS One. 2020 Jan 8;15(1):e0226800. doi: 10.1371/journal.pone.0226800 (PMC6948735; doi:10.1371/journal.pone.0226800)
Supplement: S2 File — (XLSX) [file pone.0226800.s002.xlsx]

## Sheet: Sheet1
	Number of statements corresponding to :
Participant	Perfectionist Traits	Pragmatic Traits	Overall				Deemed to be one way if > 5 traits in one direction
1	2	17	Pragmatist
2	2	2	Balanced				Totals
3	5	2	Balanced				Perfectionist	8
4	15	5	Perfectionist				Pragmatist	4
5	6	4	Balanced				Balanced	19
6	0	15	Pragmatist
7	1	6	Pragmatist
8	13	1	Perfectionist
9	11	3	Perfectionist
10	6	2	Balanced
11	2	3	Balanced
12	5	3	Balanced
13	4	3	Balanced
14	8	1	Perfectionist
15	3	4	Balanced
16	6	2	Balanced
17	6	0	Perfectionist
18	8	4	Balanced
19	2	0	Balanced
20	6	2	Balanced
21	7	0	Perfectionist
22	0	8	Pragmatist
23	2	2	Balanced
24	1	2	Balanced
25	7	1	Perfectionist
26	3	2	Balanced
27	7	4	Balanced
28	12	3	Perfectionist
29	4	1	Balanced
30	7	4	Balanced
31	5	5	Balanced
	166	111
	277	1

## Sheet: Warmth 
STEN Value	Pragmatic	Perfectionist	Balanced
1			1			Participant	Overall
2	1					1	Pragmatist
3			1			2	Balanced
4						3	Balanced
5		3	6			4	Perfectionist
6	3	1	6			5	Balanced
7		3	4			6	Pragmatist
8		1	1			7	Pragmatist
9						8	Perfectionist
10						9	Perfectionist
						10	Balanced
						11	Balanced
						12	Balanced
						13	Balanced
						14	Perfectionist
						15	Balanced
						16	Balanced
		§				17	Perfectionist
						18	Balanced
						19	Balanced
						20	Balanced
						21	Perfectionist
						22	Pragmatist
						23	Balanced
						24	Balanced
						25	Perfectionist
						26	Balanced
						27	Balanced
						28	Perfectionist
						29	Balanced
						30	Balanced
						31	Balanced

## Sheet: Reasoning 
STEN Value	Pragmatic	Perfectionist	Balanced
1		1	1			Participant	Overall
2						1	Pragmatist
3			1			2	Balanced
4			2			3	Balanced
5		3	2			4	Perfectionist
6	1	3	3			5	Balanced
7	2		2			6	Pragmatist
8	1		3			7	Pragmatist
9			4			8	Perfectionist
10		1	1			9	Perfectionist
						10	Balanced
						11	Balanced
						12	Balanced
						13	Balanced
						14	Perfectionist
						15	Balanced
						16	Balanced
						17	Perfectionist
						18	Balanced
						19	Balanced
						20	Balanced
						21	Perfectionist
						22	Pragmatist
						23	Balanced
						24	Balanced
						25	Perfectionist
						26	Balanced
						27	Balanced
						28	Perfectionist
						29	Balanced
						30	Balanced
						31	Balanced

## Sheet: Emotional Stability 
STEN Value	Pragmatic	Perfectionist	Balanced
1						Participant	Overall
2						1	Pragmatist
3	1	1				2	Balanced
4	1	1	1			3	Balanced
5			3			4	Perfectionist
6		2	5			5	Balanced
7			4			6	Pragmatist
8	1	2	5			7	Pragmatist
9	1	1	1			8	Perfectionist
10			1			9	Perfectionist
						10	Balanced
						11	Balanced
						12	Balanced
						13	Balanced
						14	Perfectionist
						15	Balanced
						16	Balanced
						17	Perfectionist
						18	Balanced
						19	Balanced
						20	Balanced
						21	Perfectionist
						22	Pragmatist
						23	Balanced
						24	Balanced
						25	Perfectionist
						26	Balanced
						27	Balanced
						28	Perfectionist
						29	Balanced
						30	Balanced
						31	Balanced

## Sheet: Dominance 
STEN Value	Pragmatic	Perfectionist	Balanced
1						Participant	Overall
2						1	Pragmatist
3						2	Balanced
4		1	2			3	Balanced
5	3	2	6			4	Perfectionist
6	1	1	4			5	Balanced
7		2	4			6	Pragmatist
8		1	2			7	Pragmatist
9		1	1			8	Perfectionist
10						9	Perfectionist
						10	Balanced
						11	Balanced
						12	Balanced
						13	Balanced
						14	Perfectionist
						15	Balanced
						16	Balanced
		§				17	Perfectionist
						18	Balanced
						19	Balanced
						20	Balanced
						21	Perfectionist
						22	Pragmatist
						23	Balanced
						24	Balanced
						25	Perfectionist
						26	Balanced
						27	Balanced
						28	Perfectionist
						29	Balanced
						30	Balanced
						31	Balanced

## Sheet: Liveliness 
STEN Value	Pragmatic	Perfectionist	Balanced
1						Participant	Overall
2			1			1	Pragmatist
3	3		2			2	Balanced
4	1	2				3	Balanced
5		1	4			4	Perfectionist
6		3	4			5	Balanced
7		1				6	Pragmatist
8			5			7	Pragmatist
9		1	4			8	Perfectionist
10						9	Perfectionist
						10	Balanced
						11	Balanced
						12	Balanced
						13	Balanced
						14	Perfectionist
						15	Balanced
						16	Balanced
						17	Perfectionist
						18	Balanced
						19	Balanced
						20	Balanced
						21	Perfectionist
						22	Pragmatist
						23	Balanced
						24	Balanced
						25	Perfectionist
						26	Balanced
						27	Balanced
						28	Perfectionist
						29	Balanced
						30	Balanced
						31	Balanced

## Sheet: Rule-consciousness 
STEN Value	Pragmatic	Perfectionist	Balanced
1			2			Participant	Overall
2	1		1			1	Pragmatist
3	1	1				2	Balanced
4		1	2			3	Balanced
5		3	2			4	Perfectionist
6	1	2	6			5	Balanced
7			3			6	Pragmatist
8	1	1	1			7	Pragmatist
9			2			8	Perfectionist
10						9	Perfectionist
						10	Balanced
						11	Balanced
						12	Balanced
						13	Balanced
						14	Perfectionist
						15	Balanced
						16	Balanced
						17	Perfectionist
						18	Balanced
						19	Balanced
						20	Balanced
						21	Perfectionist
						22	Pragmatist
						23	Balanced
						24	Balanced
						25	Perfectionist
						26	Balanced
						27	Balanced
						28	Perfectionist
						29	Balanced
						30	Balanced
						31	Balanced

## Sheet: Social Boldness
STEN Value	Pragmatic	Perfectionist	Balanced
1						Participant	Overall
2						1	Pragmatist
3	1	2	1			2	Balanced
4			1			3	Balanced
5	1	2	3			4	Perfectionist
6	2	2	4			5	Balanced
7		1	2			6	Pragmatist
8		1	6			7	Pragmatist
9			2			8	Perfectionist
10						9	Perfectionist
						10	Balanced
						11	Balanced
						12	Balanced
						13	Balanced
						14	Perfectionist
						15	Balanced
						16	Balanced
		§				17	Perfectionist
						18	Balanced
						19	Balanced
						20	Balanced
						21	Perfectionist
						22	Pragmatist
						23	Balanced
						24	Balanced
						25	Perfectionist
						26	Balanced
						27	Balanced
						28	Perfectionist
						29	Balanced
						30	Balanced
						31	Balanced

## Sheet: Sensitivity 
STEN Value	Pragmatic	Perfectionist	Balanced
1	1		2			Participant	Overall
2			2			1	Pragmatist
3			2			2	Balanced
4	1					3	Balanced
5		1	3			4	Perfectionist
6	2	3	6			5	Balanced
7			3			6	Pragmatist
8		1	1			7	Pragmatist
9		2				8	Perfectionist
10		1				9	Perfectionist
						10	Balanced
						11	Balanced
						12	Balanced
						13	Balanced
						14	Perfectionist
						15	Balanced
						16	Balanced
						17	Perfectionist
						18	Balanced
						19	Balanced
						20	Balanced
						21	Perfectionist
						22	Pragmatist
						23	Balanced
						24	Balanced
						25	Perfectionist
						26	Balanced
						27	Balanced
						28	Perfectionist
						29	Balanced
						30	Balanced
						31	Balanced

## Sheet: Vigilance 
STEN Value	Pragmatic	Perfectionist	Balanced
1						Participant	Overall
2			4			1	Pragmatist
3	1	3	5			2	Balanced
4	1		4			3	Balanced
5	1	3	1			4	Perfectionist
6	1	1	3			5	Balanced
7						6	Pragmatist
8			1			7	Pragmatist
9		1	1			8	Perfectionist
10						9	Perfectionist
						10	Balanced
						11	Balanced
						12	Balanced
						13	Balanced
						14	Perfectionist
						15	Balanced
						16	Balanced
						17	Perfectionist
						18	Balanced
						19	Balanced
						20	Balanced
						21	Perfectionist
						22	Pragmatist
						23	Balanced
						24	Balanced
						25	Perfectionist
						26	Balanced
						27	Balanced
						28	Perfectionist
						29	Balanced
						30	Balanced
						31	Balanced

[truncated: 7 more sheets: Abstractedness, Privateness , Apprehension, Openness to change, Self-Reliance , Perfectionism, Tension]
